# Supplementary material for: Well-ordered Cs–Ru/@SBA-15 nanocomposite materials for low pressure ammonia synthesis
Source: Royal Society of Chemistry journal article supplement (doi:10.1039/d0se01077d), 2020-01-01
Supplement: d0se01077d1.pdf [file d0se01077d1.pdf]

## Electronic Supplementary Information

### **Well-ordered Cs-Ru/@SBA-15 nanocomposite materials for low pressure ammonia synthesis**

Shih-Yuan Chen,<sup>\*a</sup> Masayasu Nishi,<sup>a</sup> Albert Chang,<sup>b</sup> Wei-Chih Hsiao,<sup>b</sup> Takehisa

Mochizuki,<sup>a</sup> Hideyuki Takagi<sup>a,c</sup> and Chia-Min Yang<sup>b,d</sup>

#### **Table of Contents**

|                                                                                                                                                                                                                                                                                                                                                                                                                                                                                                                                  |   |
|----------------------------------------------------------------------------------------------------------------------------------------------------------------------------------------------------------------------------------------------------------------------------------------------------------------------------------------------------------------------------------------------------------------------------------------------------------------------------------------------------------------------------------|---|
| <b>Figure S1.</b> STEM images of prepared samples: (a,b) 20Cs-6Ru/@SBA-15 and (c,d) 27Cs-8Ru/@SBA-15, (e,f) 6.6Cs-2.5Ru/C-SBA-15, and (g,h) 33Cs-10Ru/C-SBA-15.....                                                                                                                                                                                                                                                                                                                                                              | 2 |
| <b>Figure S2.</b> H <sub>2</sub> -TPR-MS profile of commercial RuO <sub>2</sub> .....                                                                                                                                                                                                                                                                                                                                                                                                                                            | 3 |
| <b>Figure S3.</b> Ammonia synthesis over the 13Cs-4Ru/@SBA-15 catalyst at 0.9 MPa using a H <sub>2</sub> /N <sub>2</sub> molar ratio of 0.2 and a total flow rate of 108 mL min <sup>-1</sup> , corresponding to a SV value of 9000 h <sup>-1</sup> .....                                                                                                                                                                                                                                                                        | 4 |
| <b>Figure S4.</b> (A) Wide-angle XRD patterns and (B) N <sub>2</sub> adsorption–desorption isotherms of: (a) fresh and (b) used 13Cs-4Ru/@SBA-15 catalysts.....                                                                                                                                                                                                                                                                                                                                                                  | 5 |
| <b>Figure S5.</b> Effects of Cs/Ru molar ratio on (a) the ammonia synthesis activity and corresponding temperature, and (b) specific BET area and surface Cs concentration of prepared 13Cs-4Ru/@SBA-15 catalyst. In Fig. S5(a), the G1 grade standard gases of H <sub>2</sub> and N <sub>2</sub> (H <sub>2</sub> /N <sub>2</sub> = 3) with a total flow rate of 30 mL min <sup>-1</sup> were used, corresponding to an SV value of 3740 h <sup>-1</sup> . The reaction pressure was kept at 0.1 MPa (atmospheric pressure)..... | 6 |
| <b>Figure S6.</b> Effect of reduction temperature on the ammonia synthesis activity of prepared 13Cs-4Ru/@SBA-15 catalyst under atmospheric pressure (0.1 MPa). The G1 grade standard gases of H <sub>2</sub> and N <sub>2</sub> (H <sub>2</sub> /N <sub>2</sub> = 3) with a total flow rate of 30 mL min <sup>-1</sup> were used, corresponding to an SV value of 3740 h <sup>-1</sup> .....                                                                                                                                    | 7 |



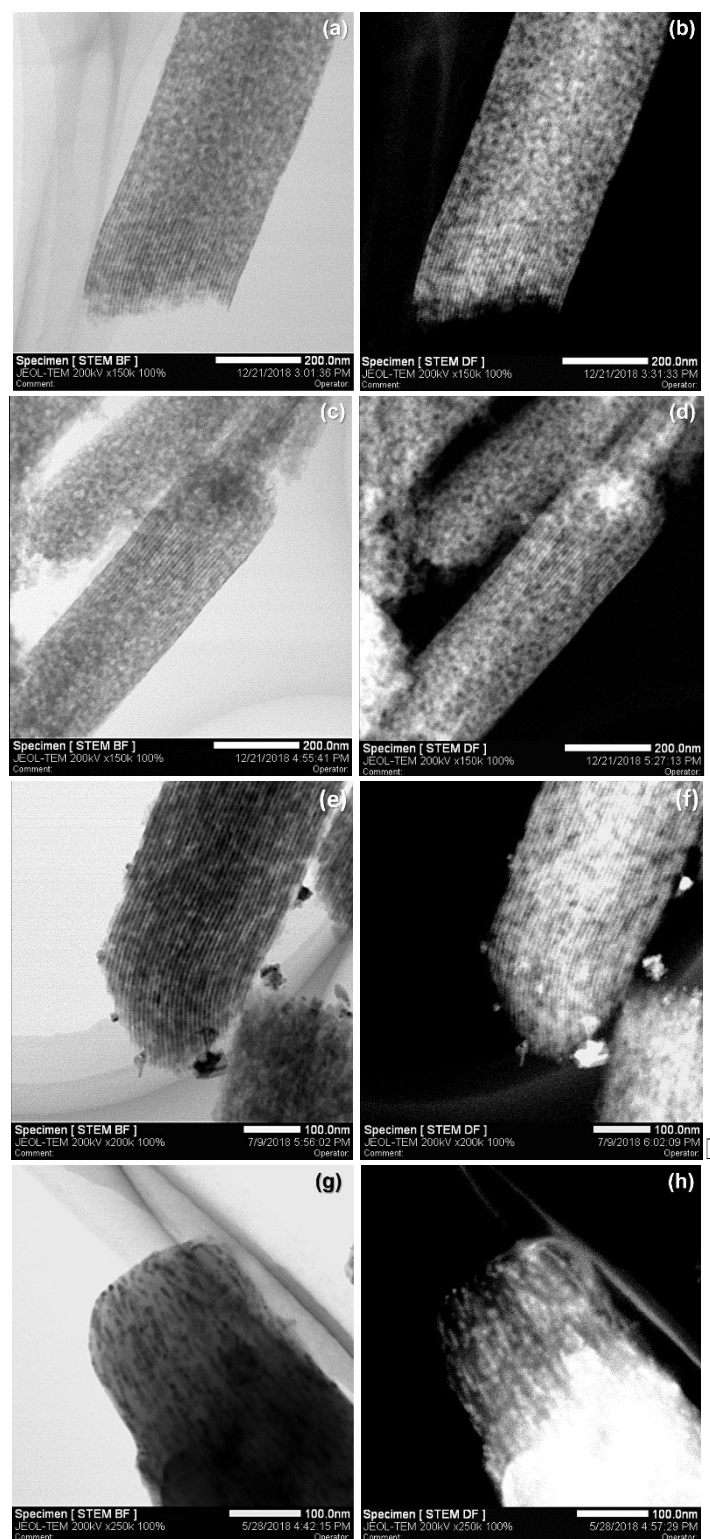

**Figure S1.** STEM images of prepared Cs-Ru materials: (a,b) 20Cs-6Ru/@SBA-15 and (c,d) 27Cs-8Ru/@SBA-15, (e,f) 6.6Cs-2.5Ru/C-SBA-15 and (g,h) 33Cs-10Ru/C-SBA-15.

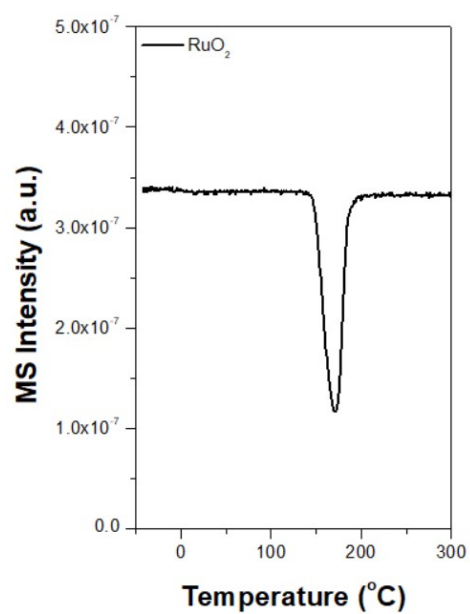

**Figure S2.** H<sub>2</sub>-TPR-MS profile of commercial RuO<sub>2</sub> recorded by a m/z ratio of 2.

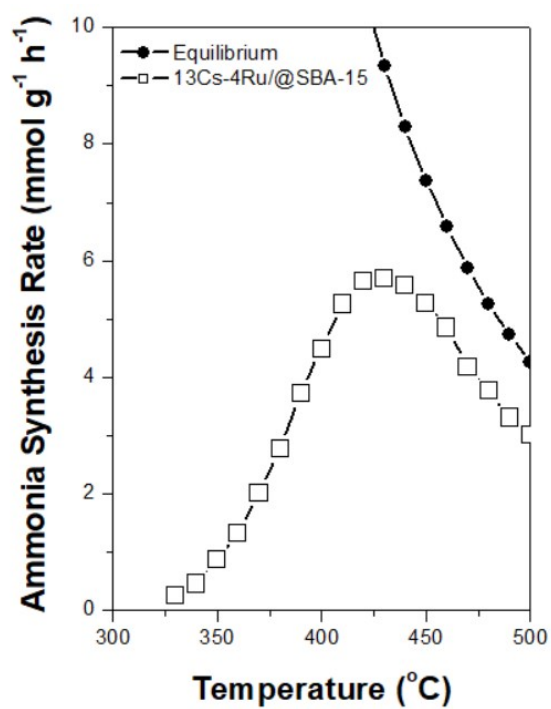

**Figure S3.** Ammonia synthesis over the 13Cs-4Ru/@SBA-15 catalyst at 0.9 MPa using a H<sub>2</sub>/N<sub>2</sub> molar ratio of 0.2 and a total flow rate of 108 mL min<sup>-1</sup>, corresponding to a SV value of 9000 h<sup>-1</sup>.

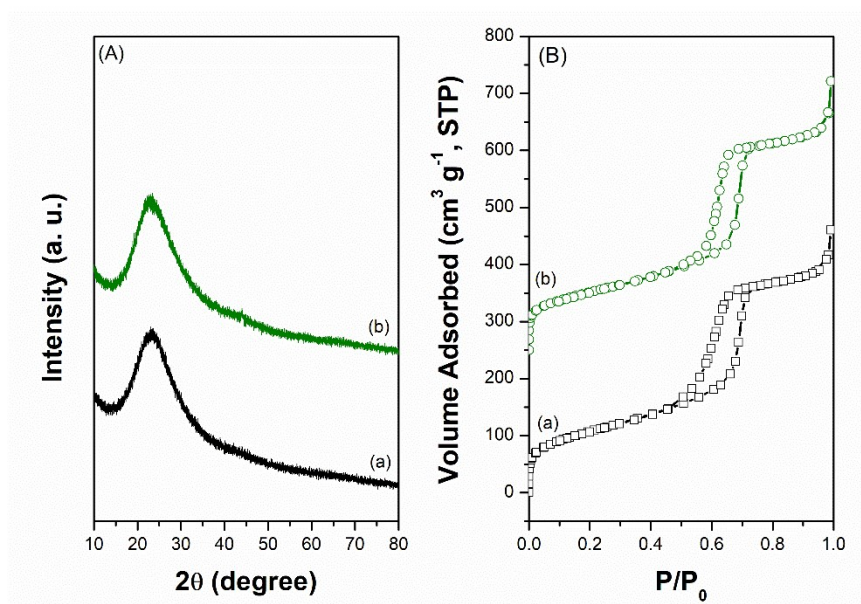

**Figure S4.** (A) Wide-angle XRD patterns and (B) N<sub>2</sub> adsorption-desorption isotherms of: (a) fresh and (b) used 13Cs-4Ru/@SBA-15 catalysts.

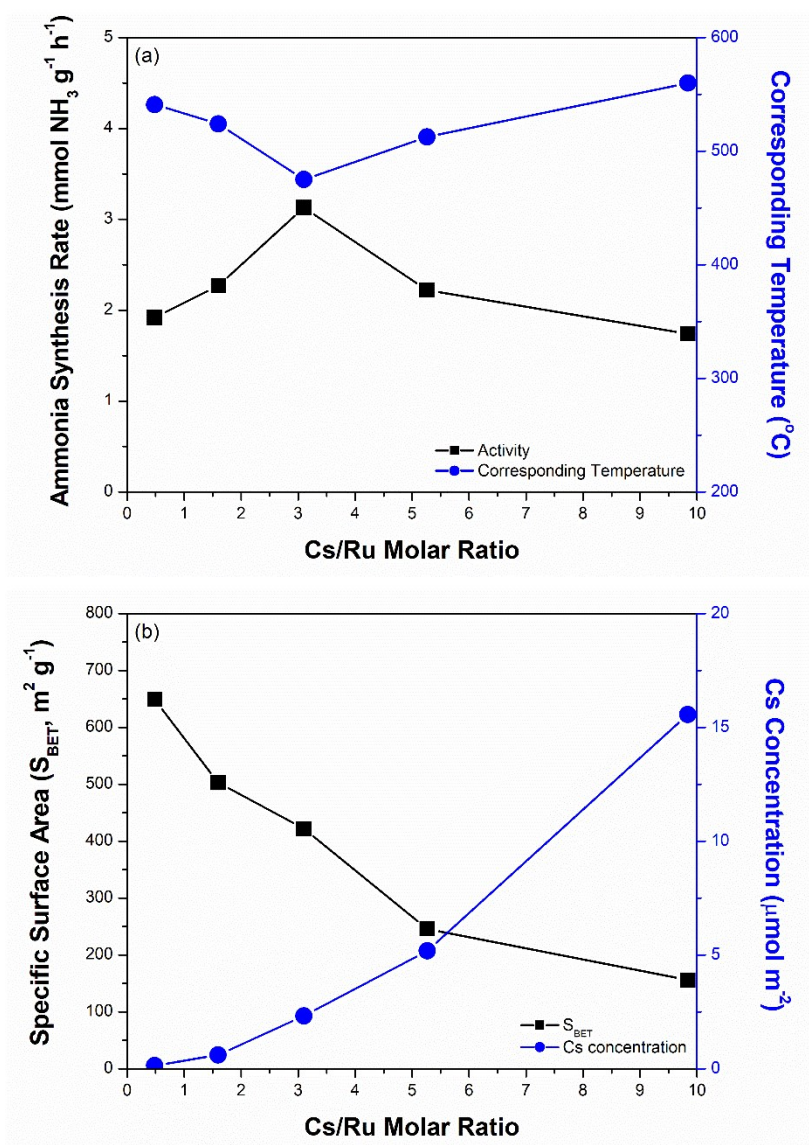

**Figure S5.** Effects of Cs/Ru molar ratio on (a) the ammonia synthesis activity and corresponding temperature, and (b) specific BET area and surface Cs concentration of prepared 13Cs-4Ru/@SBA-15 catalyst. In Fig. S5(a), the G1 grade standard gases of  $\text{H}_2$  and  $\text{N}_2$  ( $\text{H}_2/\text{N}_2 = 3$ ) with a total flow rate of  $30 \text{ mL min}^{-1}$  were used, corresponding to an SV value of  $3740 \text{ h}^{-1}$ . The reaction pressure was kept at 0.1 MPa (atmospheric pressure).

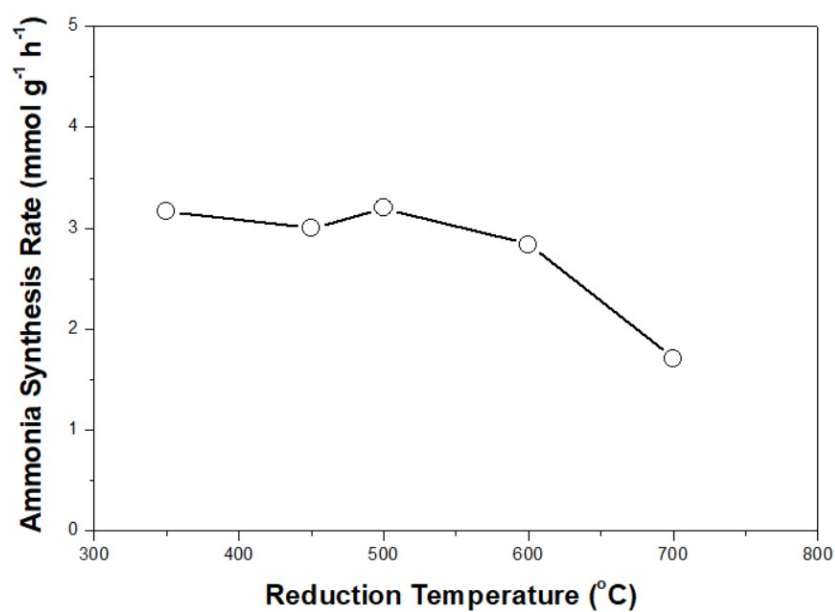

**Figure S6.** Effect of reduction temperature on the ammonia synthesis activity of prepared 13Cs-4Ru/@SBA-15 catalyst under atmospheric pressure (0.1 MPa). The G1 grade standard gases of  $\text{H}_2$  and  $\text{N}_2$  ( $\text{H}_2/\text{N}_2 = 3$ ) with a total flow rate of  $30 \text{ mL min}^{-1}$  were used, corresponding to an SV value of  $3740 \text{ h}^{-1}$ .
